# Supplementary material for: Unusual truncation of N-acylated peptoids under acidic conditions
Source: Royal Society of Chemistry journal article supplement (doi:10.1039/c3ob42572j), 2014-01-01
Supplement: c3ob42572j1.pdf [file c3ob42572j1.pdf]

– **Electronic Supplementary Information (ESI)** –

**Unusual truncation of *N*-acylated peptoids under acidic conditions**

**Soomin Kim, Goutam Biswas, Shinae Park, Arim Kim, Hyunjung Park, Eunsook Park, Jeongmi Kim and Yong-Uk Kwon\***

*Department of Chemistry and Nano Science, Ewha Global Top 5 Program, Ewha Womans University, Seoul 120-750, South Korea; E-mail: yukwon@ewha.ac.kr*

**Table of contents**

|                                                                               |       |        |
|-------------------------------------------------------------------------------|-------|--------|
| <b>Table S1.</b> TFA-assisted cleavage of <i>N</i> -acetylated model peptoids | ----- | S2     |
| <b>Table S2.</b> TFA-assisted cleavage of various <i>N</i> -acylated peptoids | ----- | S3     |
| <b>Table S3.</b> HPLC retention time and MALDI-TOF data of peptoids           | ----- | S4     |
| <b>Figure S1-S15.</b> HPLC chromatograms and MS spectra                       | ----- | S5-S21 |

**Table S1.** TFA-assisted cleavage of *N*-acetylated model peptoids

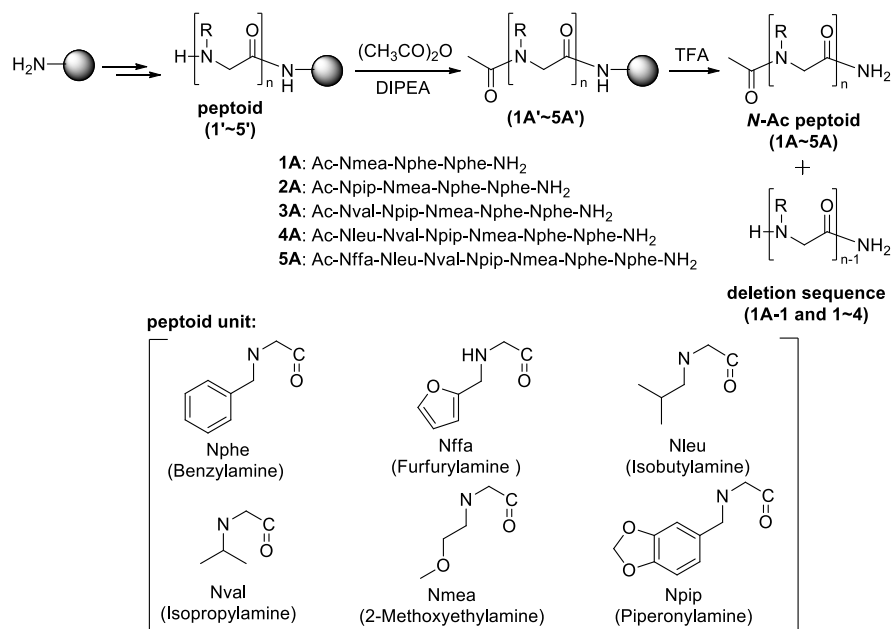

| Entry | Peptoid    | Cleavage conditions <sup>a</sup> | Product (%) <sup>b</sup> |                    |
|-------|------------|----------------------------------|--------------------------|--------------------|
|       |            |                                  | <i>N</i> -Ac peptoid     | Deletion sequence  |
| 1     |            | A                                | <b>1A</b> (67.0)         | <b>1A-1</b> (33.0) |
| 2     | <b>1A'</b> | B                                | <b>1A</b> (70.7)         | <b>1A-1</b> (29.3) |
| 3     |            | A                                | <b>2A</b> (80.9)         | <b>1</b> (19.1)    |
| 4     | <b>2A'</b> | B                                | <b>2A</b> (84.6)         | <b>1</b> (15.4)    |
| 5     |            | A                                | <b>3A</b> (0)            | <b>2</b> (100)     |
| 6     | <b>3A'</b> | B                                | <b>3A</b> (0)            | <b>2</b> (100)     |
| 7     |            | A                                | <b>4A</b> (74.3)         | <b>3</b> (25.7)    |
| 8     | <b>4A'</b> | B                                | <b>4A</b> (82.7)         | <b>3</b> (17.3)    |
| 9     |            | A                                | <b>5A</b> (93.8)         | <b>4</b> (6.2)     |
| 10    | <b>5A'</b> | B                                | <b>5A</b> (94.5)         | <b>4</b> (5.5)     |

<sup>a</sup> Conditions A: 92% TFA/3% TIS/5% H<sub>2</sub>O, 1 h; B: 50% TFA/3% TIS/5% H<sub>2</sub>O/42% CH<sub>2</sub>Cl<sub>2</sub>, 1 h.

<sup>b</sup> Relative yields of *N*-Ac peptoids and deletion sequences were determined by HPLC analysis.

**Table S2.** TFA-assisted cleavage of various *N*-acylated peptoids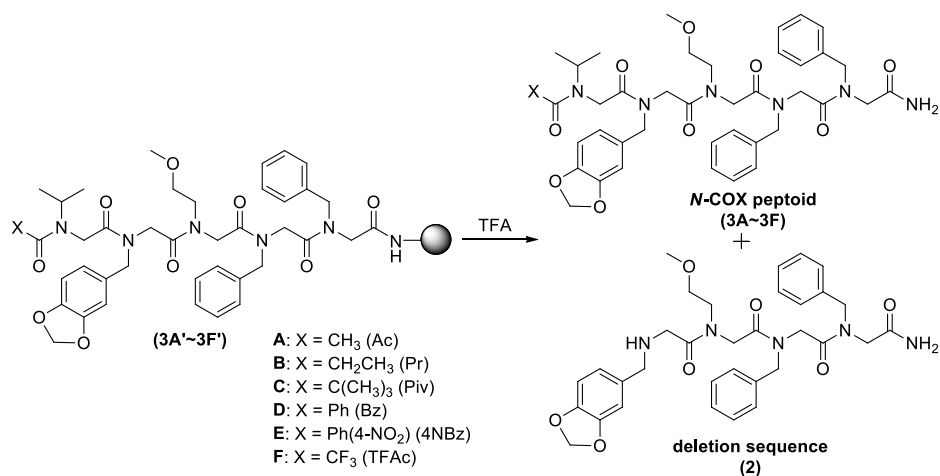

| Entry | Acyl group | Cleavage conditions <sup>a</sup> | Product (%) <sup>b</sup>            |                                   |
|-------|------------|----------------------------------|-------------------------------------|-----------------------------------|
|       |            |                                  | <i>N</i> -COX peptoid               | Deletion sequence                 |
| 1     |            | A                                | <b>3A</b> (0)                       | <b>2</b> (100)                    |
| 2     | Ac         | B                                | <b>3A</b> (0)                       | <b>2</b> (100)                    |
| 3     |            | A                                | <b>3B</b> (0)                       | <b>2</b> (100)                    |
| 4     | Pr         | B                                | <b>3B</b> (0)                       | <b>2</b> (100)                    |
| 5     |            | A                                | <b>3C</b> (0)                       | <b>2</b> (100)                    |
| 6     | Piv        | B                                | <b>3C</b> (0)                       | <b>2</b> (100)                    |
| 7     |            | A                                | <b>3D</b> (17.5)                    | <b>2</b> (82.5)                   |
| 8     | Bz         | B                                | <b>3D</b> (32.5)                    | <b>2</b> (67.5)                   |
| 9     |            | A                                | <b>3E</b> (96.1/89.2 <sup>c</sup> ) | <b>2</b> (3.9/10.8 <sup>c</sup> ) |
| 10    | 4-NBz      | B                                | <b>3E</b> (96.4/92.7 <sup>c</sup> ) | <b>2</b> (3.6/7.3 <sup>c</sup> )  |
| 11    |            | A                                | <b>3F</b> (100/100 <sup>c</sup> )   | <b>2</b> (0/0 <sup>c</sup> )      |
| 12    | TFAc       | B                                | <b>3F</b> (100/100 <sup>c</sup> )   | <b>2</b> (0/0 <sup>c</sup> )      |

<sup>a</sup> Conditions A: 92% TFA/3% TIS/5% H<sub>2</sub>O, 1 h; B: 50% TFA/3% TIS/5% H<sub>2</sub>O/42% CH<sub>2</sub>Cl<sub>2</sub>, 1 h. <sup>b</sup> Relative yields of *N*-COX peptoids and deletion sequences were determined by HPLC analysis. <sup>c</sup> Cleavage time: 3 h.

**Table S3.** HPLC retention time and MALDI-TOF data of peptoids

| Entry | Peptoid     | HPLC Retention time (min) <sup>a</sup> | MALDI-TOF ( <i>m/z</i> ) |               |
|-------|-------------|----------------------------------------|--------------------------|---------------|
|       |             |                                        | observed                 | calculated    |
| 1     | <b>1</b>    | 13.8                                   | 427.2                    | 427.2 (M+H)   |
| 2     | <b>1A</b>   | 18.0                                   | 491.4                    | 491.2 (M+Na)  |
| 3     | <b>1A-1</b> | 10.4                                   | 312.4                    | 312.1 (M+H)   |
| 4     | <b>2</b>    | 19.5                                   | 618.2                    | 618.3 (M+H)   |
| 5     | <b>2A</b>   | 23.2                                   | 682.3                    | 682.3 (M+Na)  |
| 6     | <b>3</b>    | 19.9                                   | 717.8                    | 717.4 (M+H)   |
| 7     | <b>4</b>    | 22.9                                   | 830.5                    | 830.4 (M+H)   |
| 8     | <b>4A</b>   | 26.9                                   | 895.0                    | 894.5 (M+Na)  |
| 9     | <b>5</b>    | 21.0                                   | 967.9                    | 967.5 (M+H)   |
| 10    | <b>5A</b>   | 29.2                                   | 1031.4                   | 1031.5 (M+Na) |
| 11    | <b>3D</b>   | 29.1                                   | 843.9                    | 843.4 (M+Na)  |
| 12    | <b>3E</b>   | 30.5                                   | 888.9                    | 888.4 (M+Na)  |
| 13    | <b>3F</b>   | 31.7                                   | 835.5                    | 835.3 (M+Na)  |

<sup>a</sup> HPLC conditions: 20% ACN/H<sub>2</sub>O to 80% ACN/H<sub>2</sub>O with 0.05% TFA for 40 min.

(a)

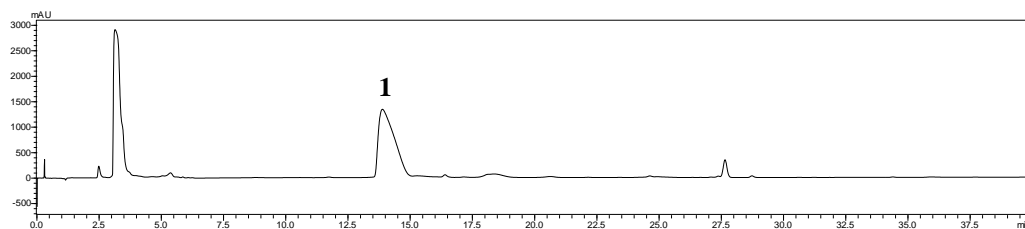

(b)

Ewha Univ.

Data: 3mer\_02\_0001.O2[c] 12 Feb 2013 12:05 Cal: SA130206 6 Feb 2013 10:16  
Shimadzu Biotech Axima Performance 2.9.3.20110624; Mode Reflectron, Power: 70, P.Ext. @ 2300 (bin 91)  
%Int. 1417 mV[sum= 72274 mV] Profiles 1-51 Unsmoothed

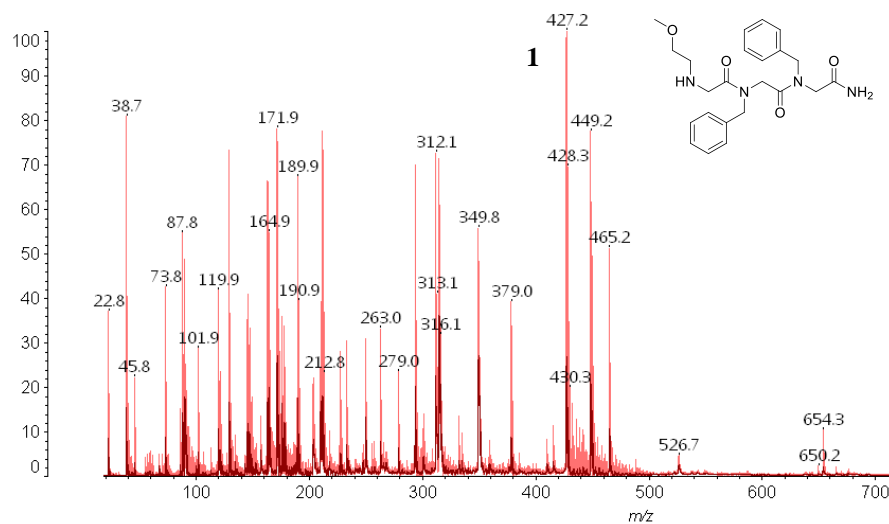

**Figure S1.** TFA-assisted cleavage of peptoid **1'**: (a) HPLC chromatogram and (b) MALDI-TOF spectrum.

(a)

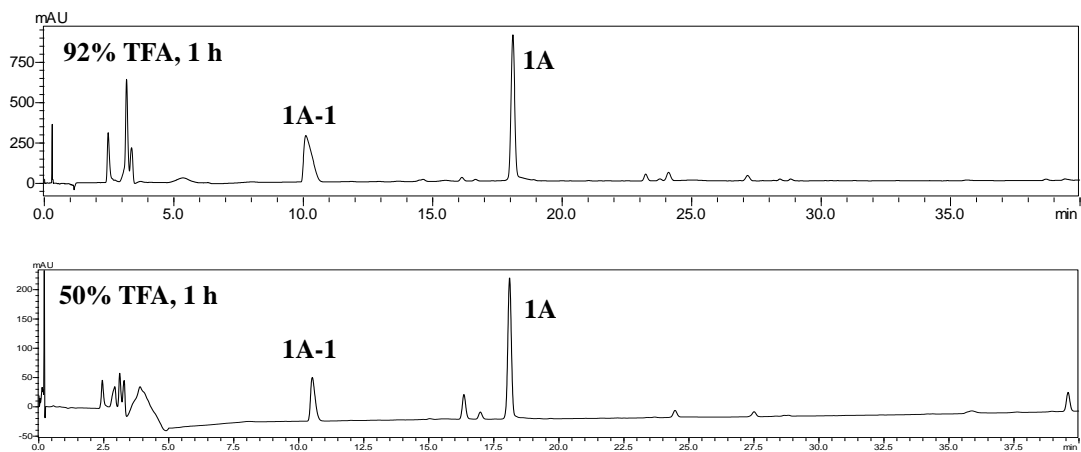

(b)

Ewha Univ.

Data: Ac\_3mer\_92TFA\_03\_0001.K5[c] 15 Feb 2013 16:43 Cal: SA130215 15 Feb 2013 15:56  
Shimadzu Biotech Axima Performance 2.9.3.20110624: Mode Reflectron, Power: 70, P.Ext. @ 2300 (bin 91)  
%Int. 1793 mV[sum= 86050 mV] Profiles 1-48 Unsmoothed

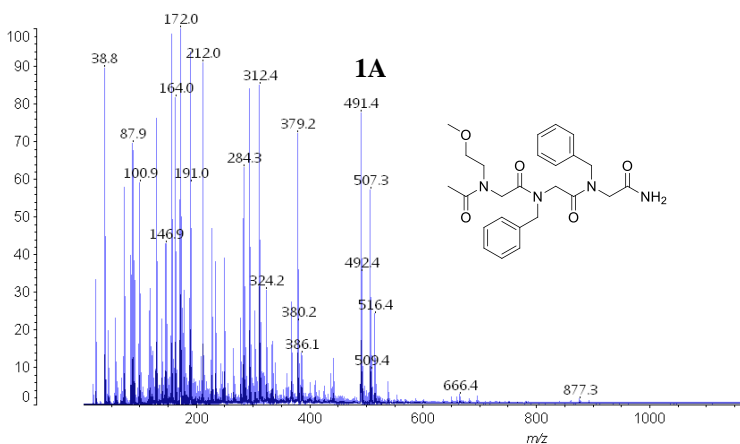

Ewha Univ.

Data: Ac\_3mer\_50TFA\_010001.O10[c] 10 Apr 2013 18:47 Cal: 26 Apr 2012 13:58  
Shimadzu Biotech Axima Performance 2.9.3.20110624: Mode Reflectron, Power: 60, P.Ext. @ 2300 (bin 91)  
%Int. 643 mV[sum= 64321 mV] Profiles 1-100 Unsmoothed

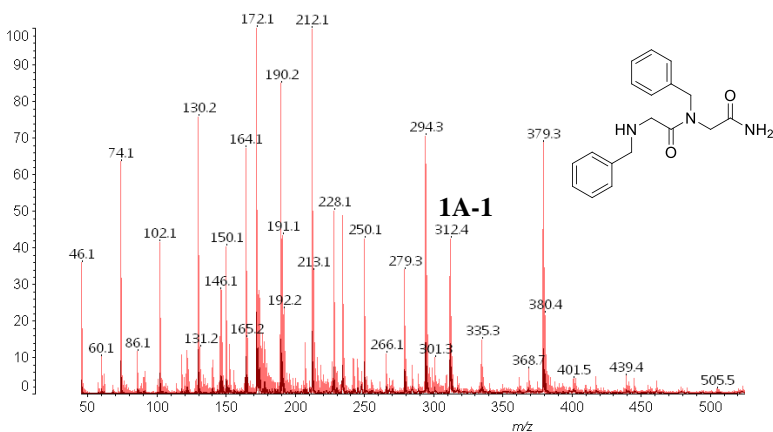

**Figure S2.** TFA-assisted cleavage of peptoid 1A': (a) HPLC chromatograms and (b) MALDI-TOF spectra.

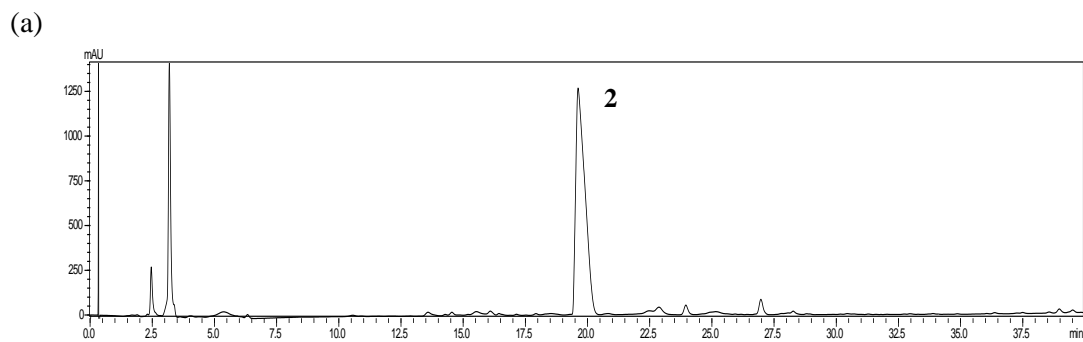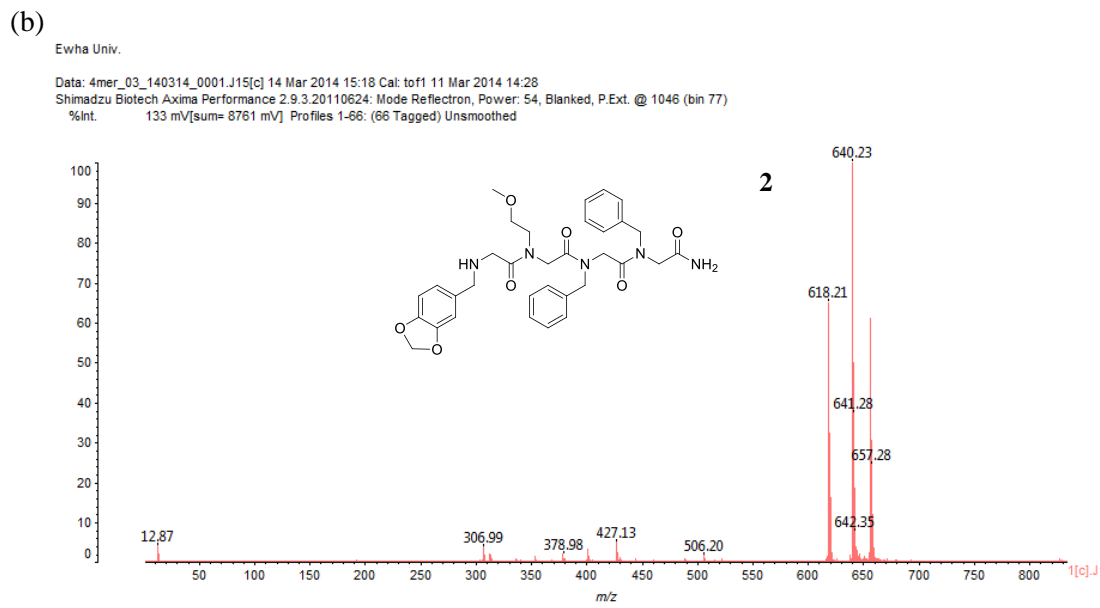

**Figure S3.** TFA-assisted cleavage of peptoid **2'**: (a) HPLC chromatogram and (b) MALDI-TOF spectrum.

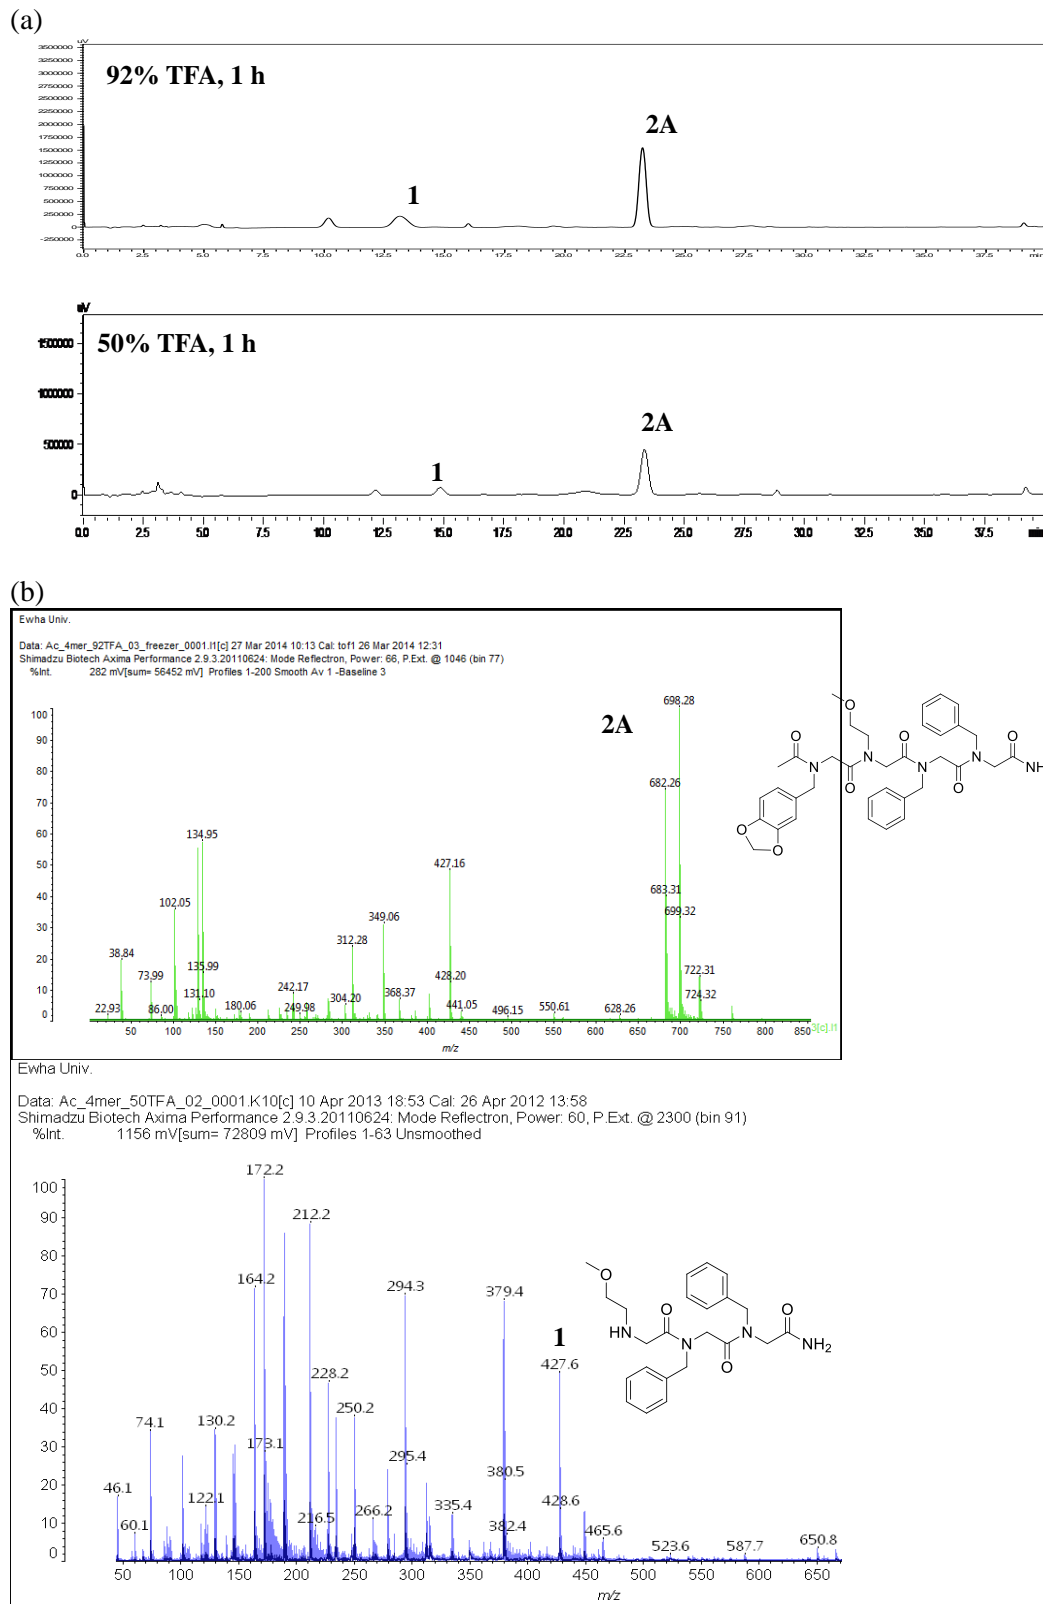

**Figure S4.** TFA-assisted cleavage of peptoid **2A'**: (a) HPLC chromatograms and (b) MALDI-TOF spectra.



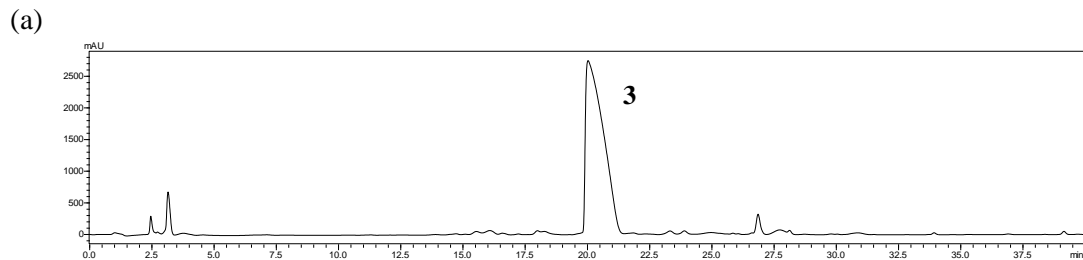

(b)

Ewha Univ.

Data: 5mer\_04\_0001.O8[c] 19 Feb 2013 14:34 Cal: SA130215 15 Feb 2013 15:56  
Shimadzu Biotech Axima Performance 2.9.3.20110624: Mode Reflectron, Power: 70, P.Ext. @ 2300 (bin 91)  
%Int. 1460 mV[sum= 46735 mV] Profiles 1-32 Unsmoothed

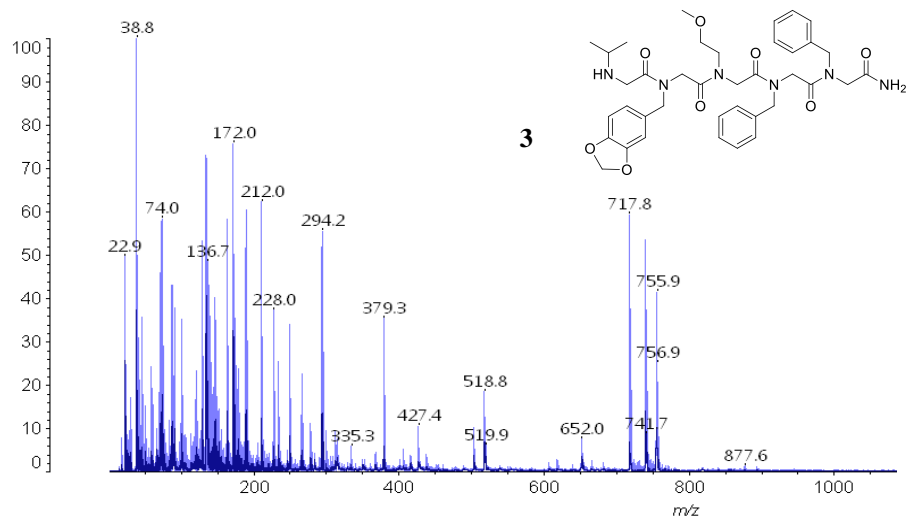

**Figure S5.** TFA-assisted cleavage of peptoid **3'**: (a) HPLC chromatogram and (b) MALDI-TOF spectrum.



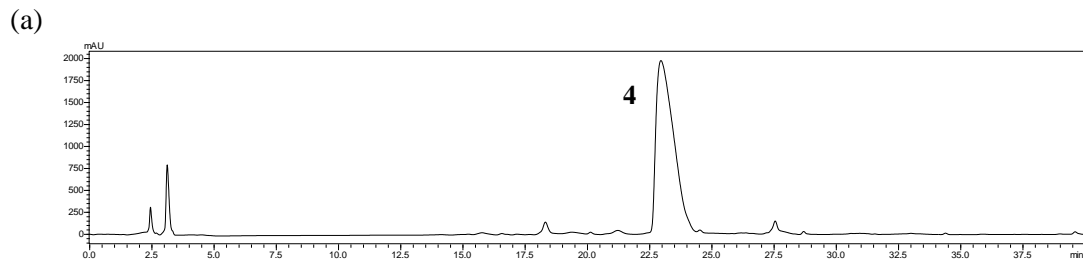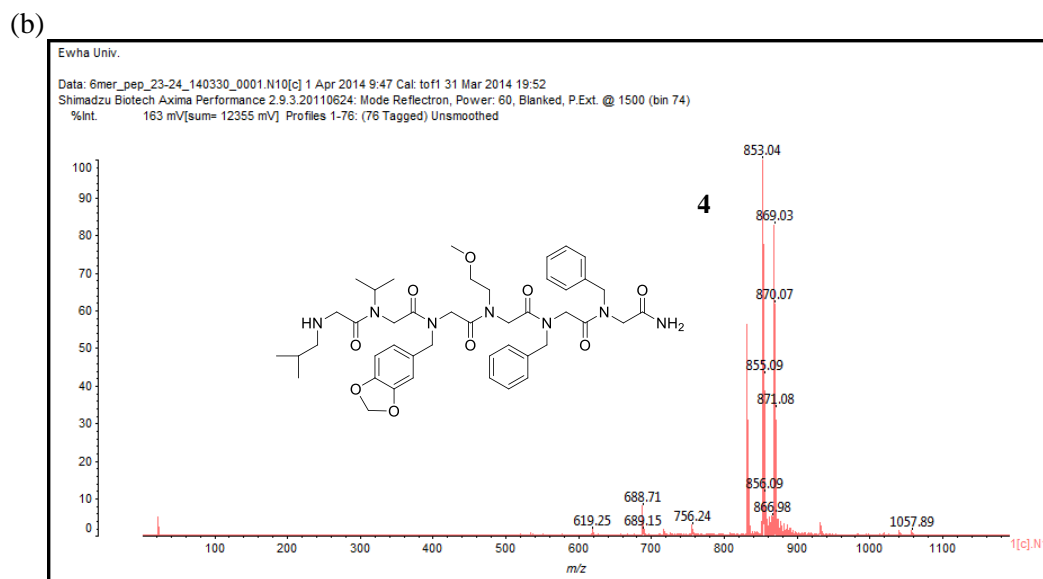

**Figure S7.** TFA-assisted cleavage of peptoid **4'**: (a) HPLC chromatogram and (b) MALDI-TOF spectrum.

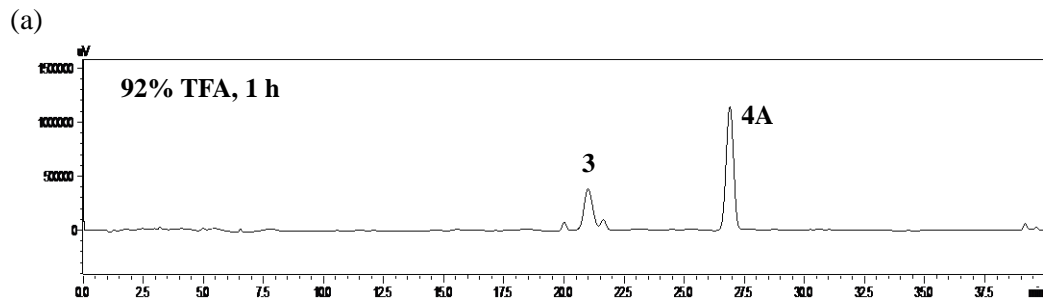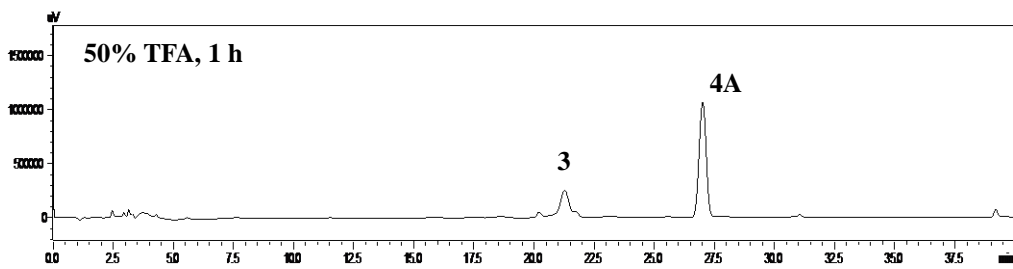

(b)

Ewha Univ.

Data: Ac\_6mer\_92TFA\_10\_0001.J10[c] 21 Feb 2013 11:35 Cal: SA130220 20 Feb 2013 16:29  
 Shimadzu Biotech Axima Performance 2.9.3.20110624; Mode Reflectron, Power: 60  
 %Int. 907 mV[sum= 80755 mV] Profiles 1-89 Unsmoothed

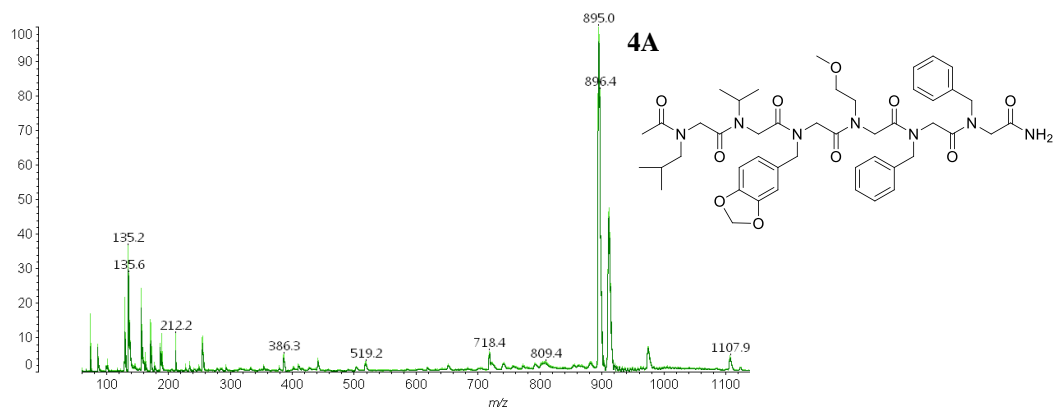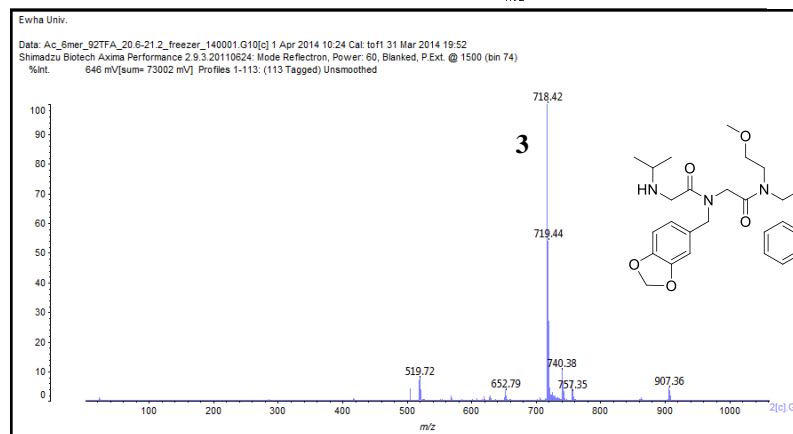

**Figure S8.** TFA-assisted cleavage of peptoid **4A'**: (a) HPLC chromatograms and (b) MALDI-TOF spectra.

(a)

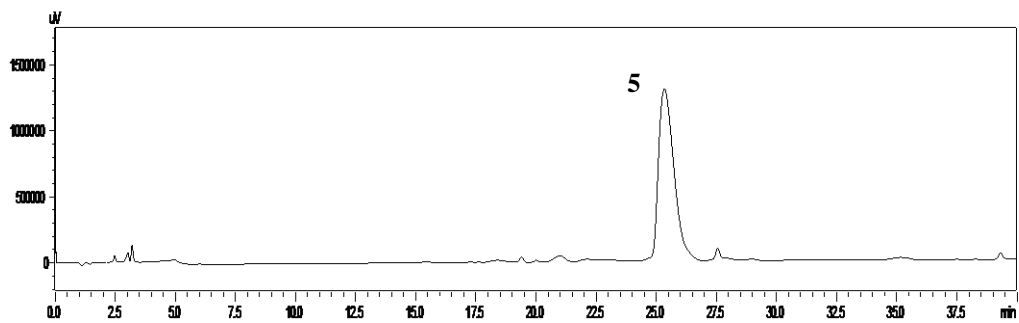

(b)

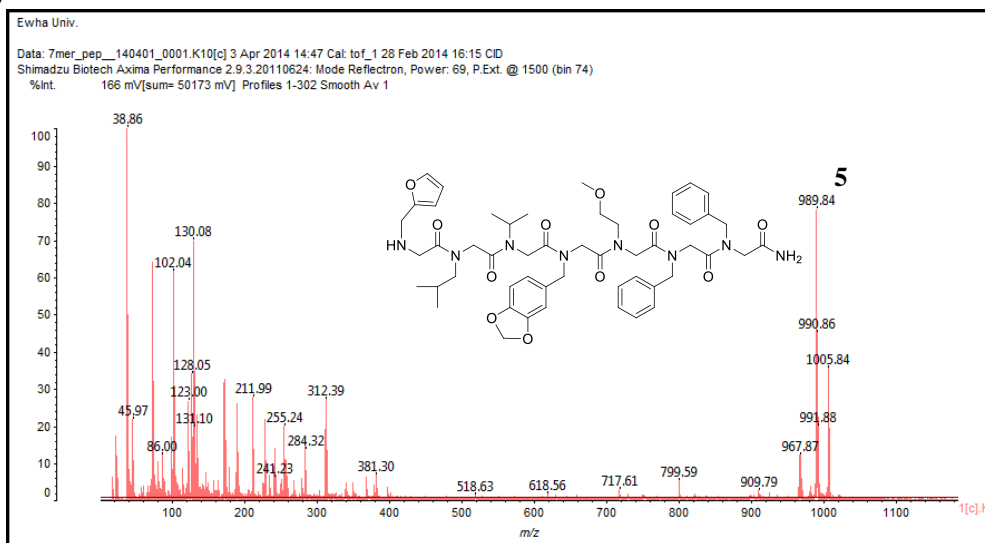

Figure S9. TFA-assisted cleavage of peptoid 5': (a) HPLC chromatogram and (b) MALDI-TOF spectrum.

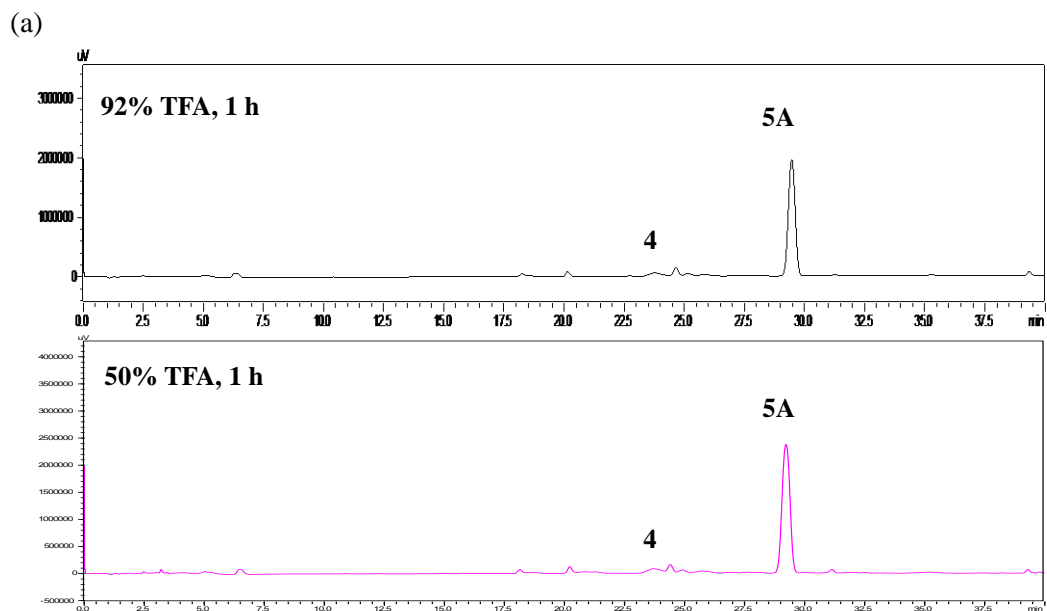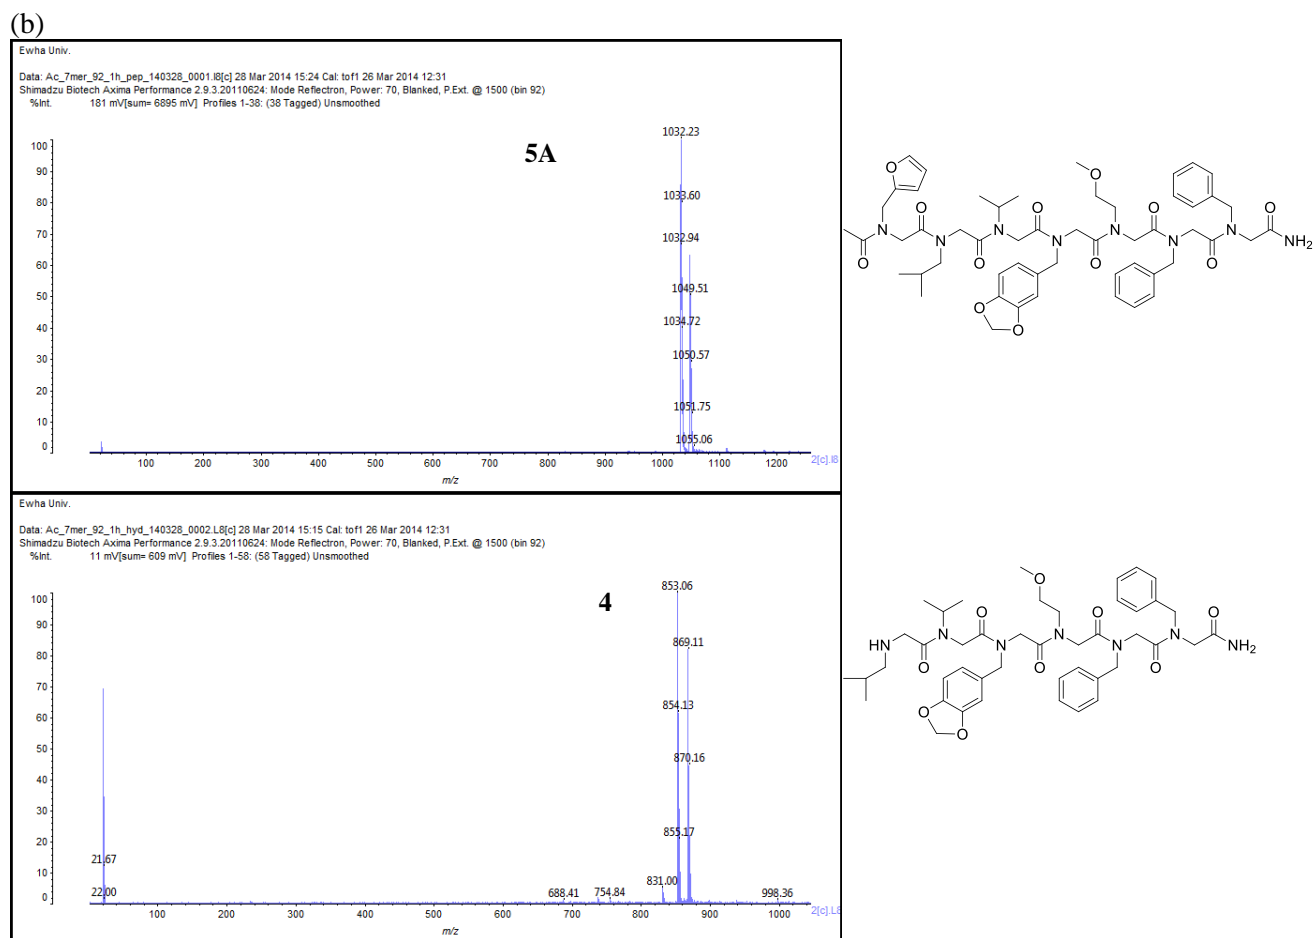

**Figure S10.** TFA-assisted cleavage of peptoid 5A': (a) HPLC chromatograms and (b) MALDI-TOF spectra.

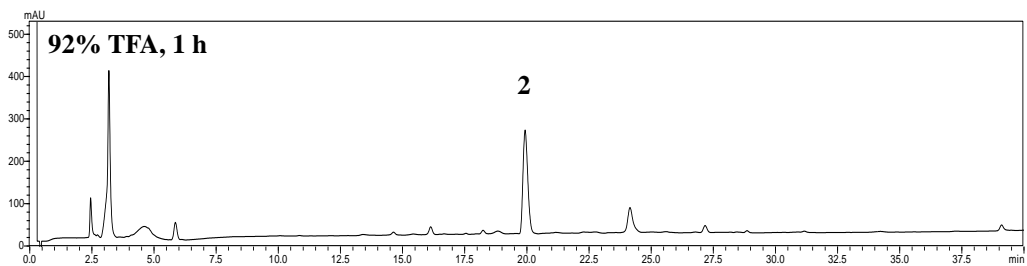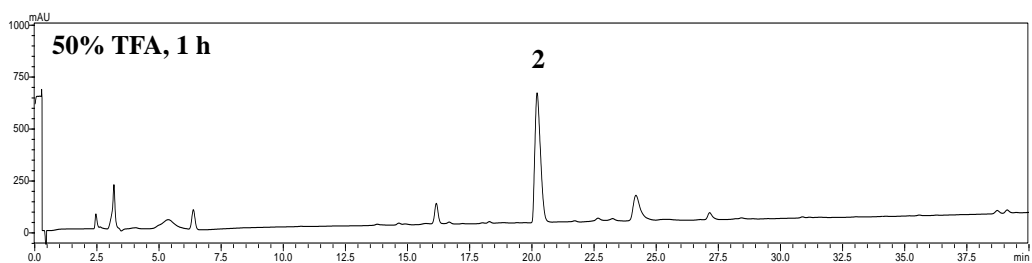

**Figure S11.** TFA-assisted cleavage of peptoid **3B'**: HPLC chromatograms.

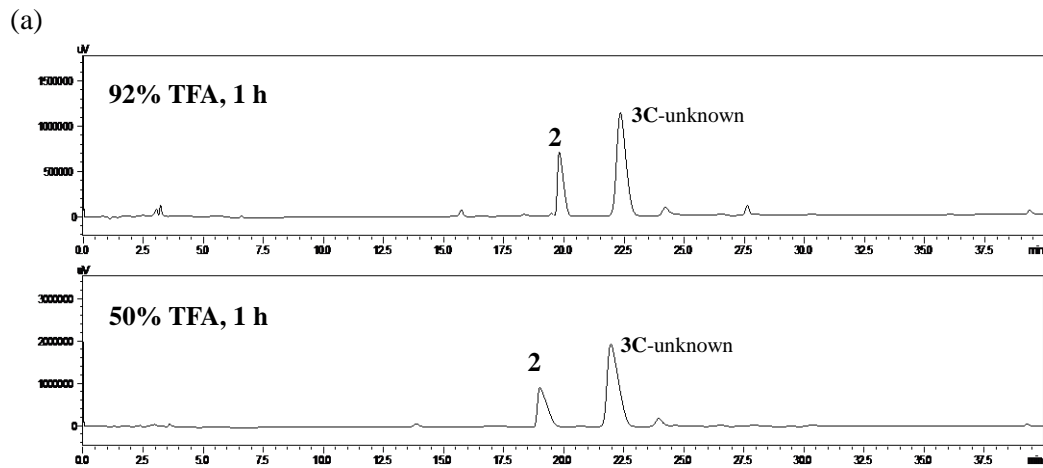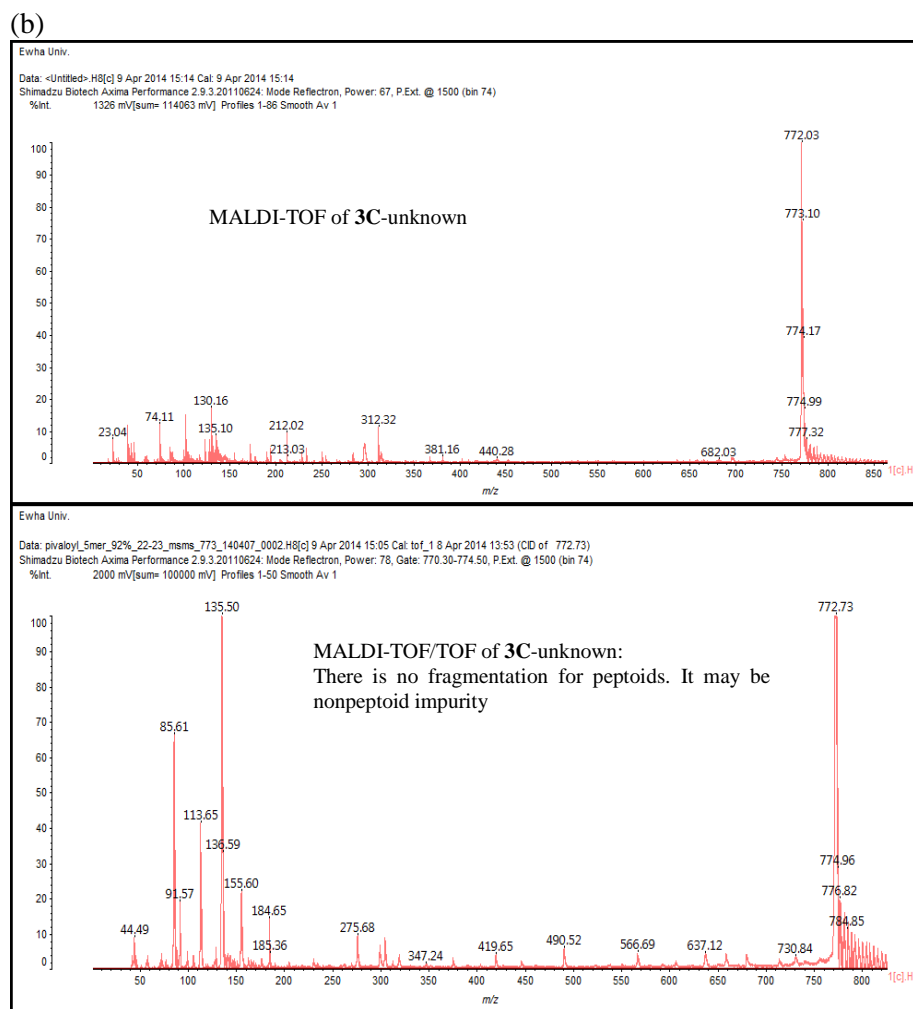

**Figure S12.** TFA-assisted cleavage of peptoid **3C'**: (a) HPLC chromatograms and (b) MALDI-TOF and MALDI-TOF/TOF spectra.



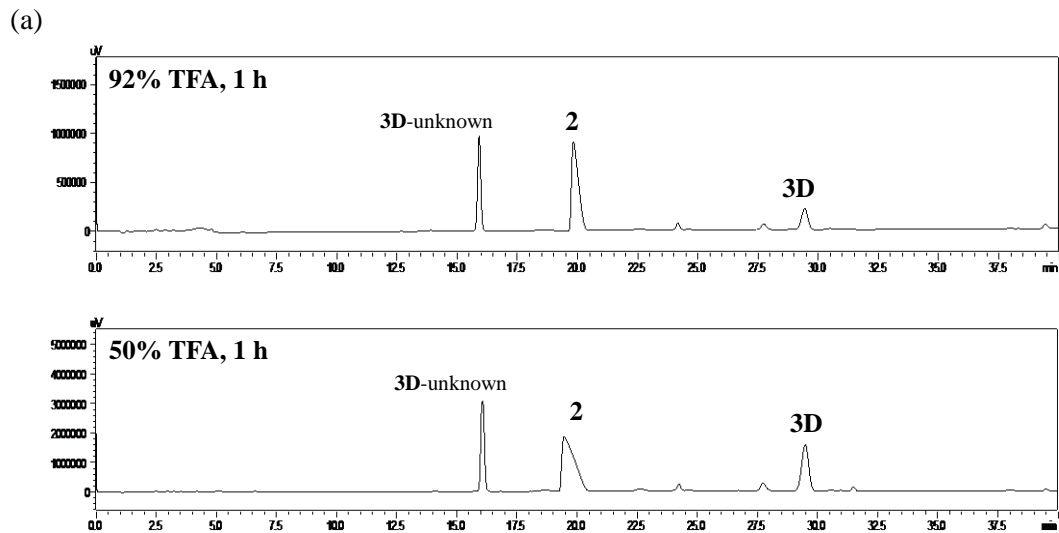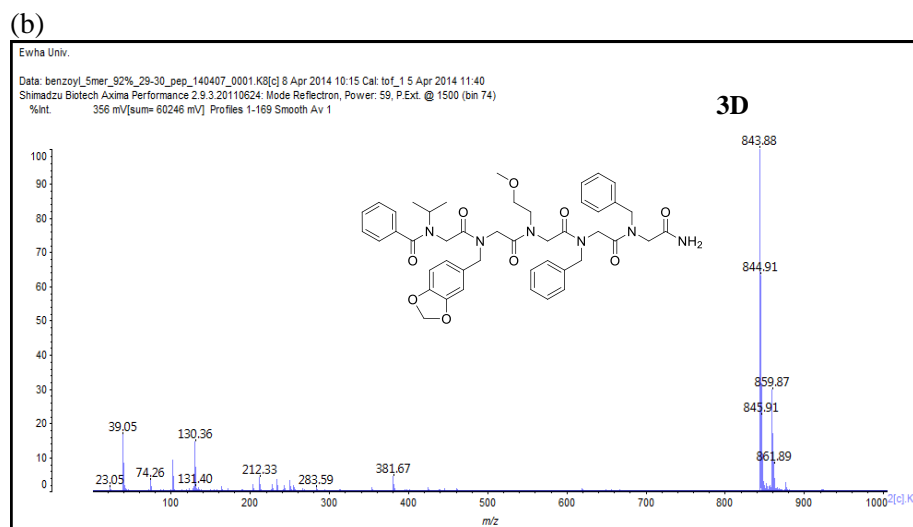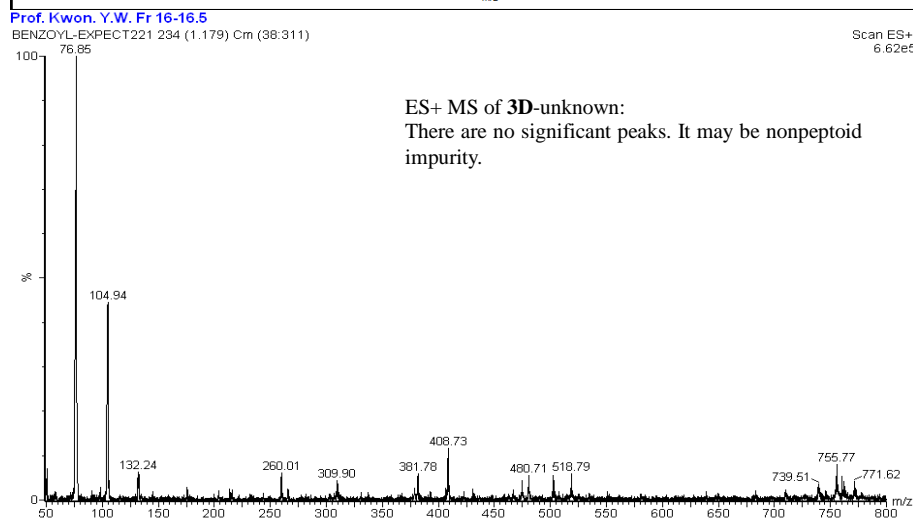

**Figure S13.** TFA-assisted cleavage of peptoid **3D'**: (a) HPLC chromatograms and (b) MALDI-TOF and ES+ spectra.



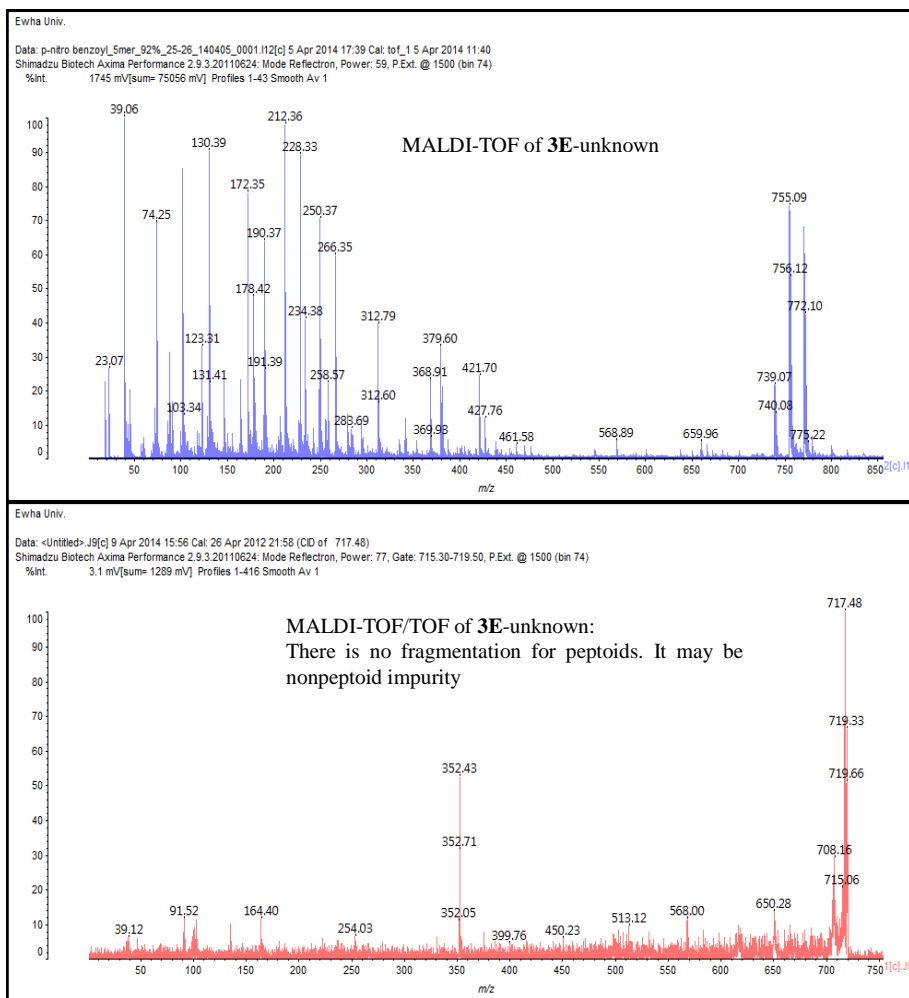

**Figure S14.** TFA-assisted cleavage of peptoid **3E'**: (a) HPLC chromatograms and (b) MALDI-TOF and MALDI-TOF/TOF spectra.

(a)

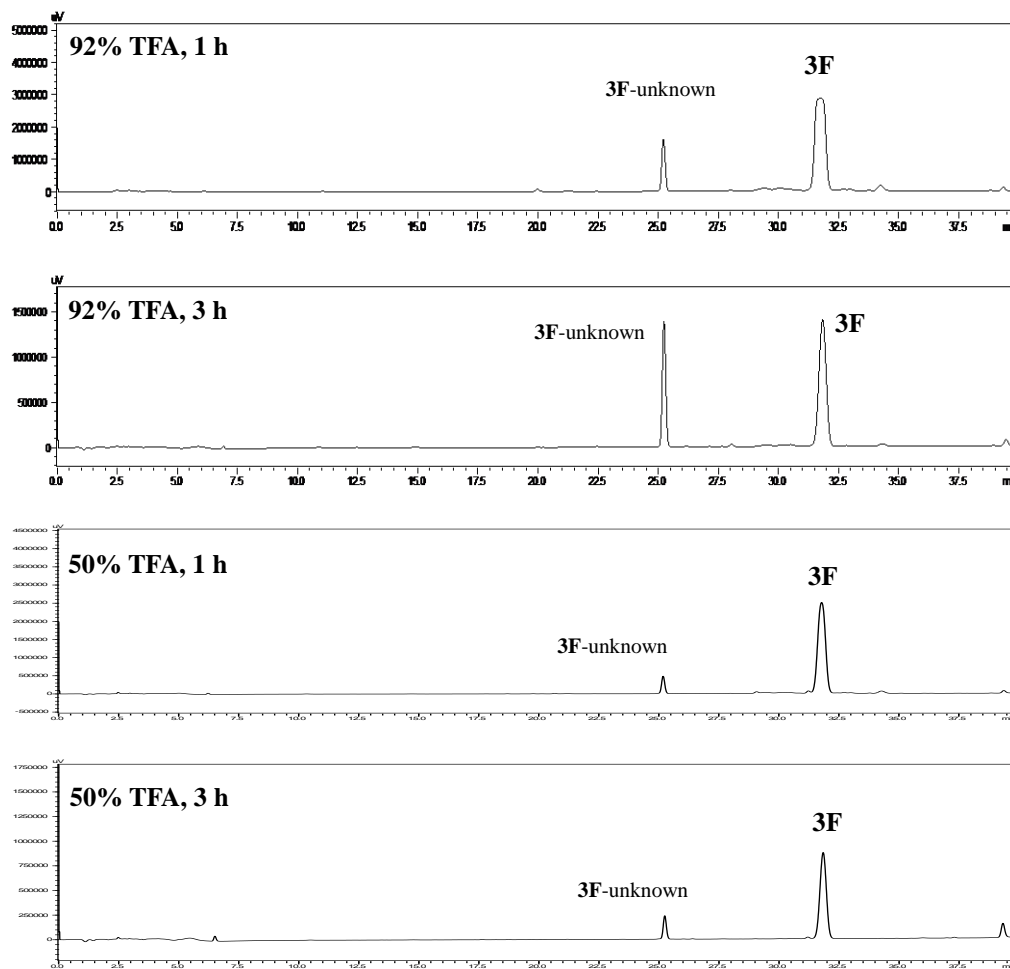

(b)

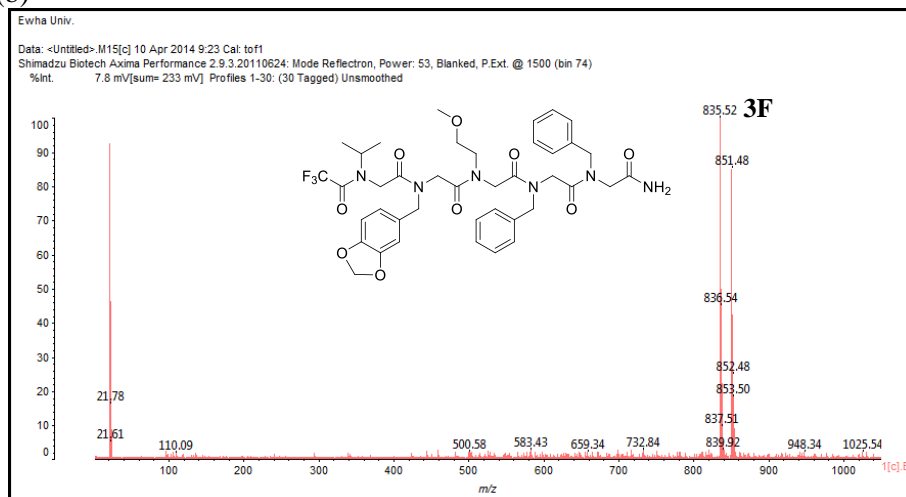

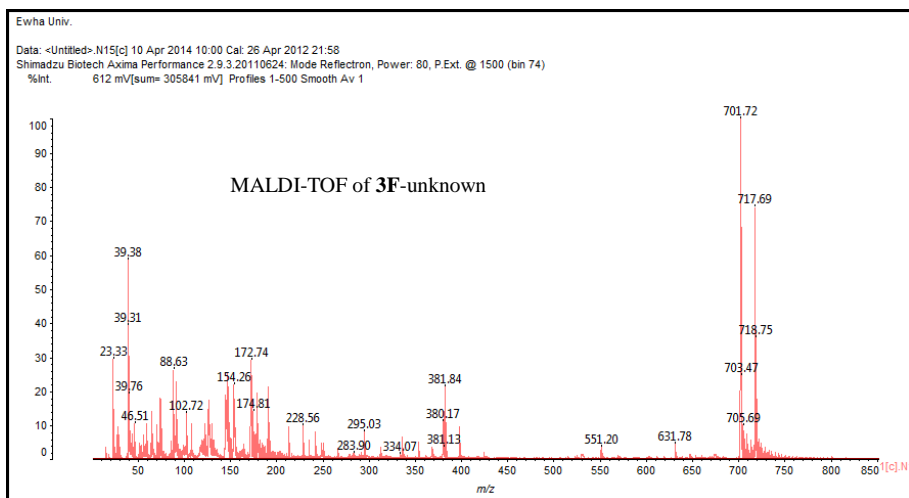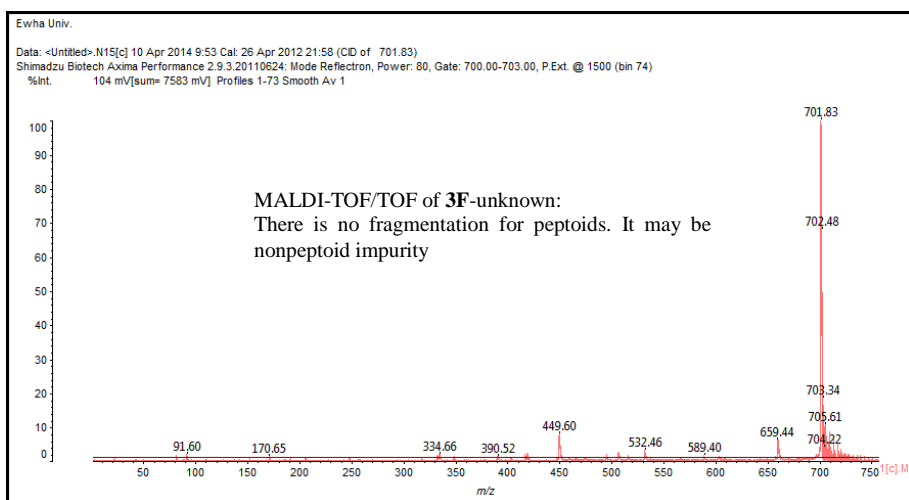

**Figure S15.** TFA-assisted cleavage of peptoid **3F'**: (a) HPLC chromatograms and (b) MALDI-TOF and MALDI-TOF/TOF spectra.
